# Supplementary material for: Air-borne in-situ measurements of aerosol size distributions and BC across the IGP during SWAAMI
Source: Copernicus journal article supplement (doi:10.5194/acp-2020-144), 2020-02-27
Supplement: Supplementary file 1 [file acp-2020-144-supplement.pdf]

1

## Supplementary Figures

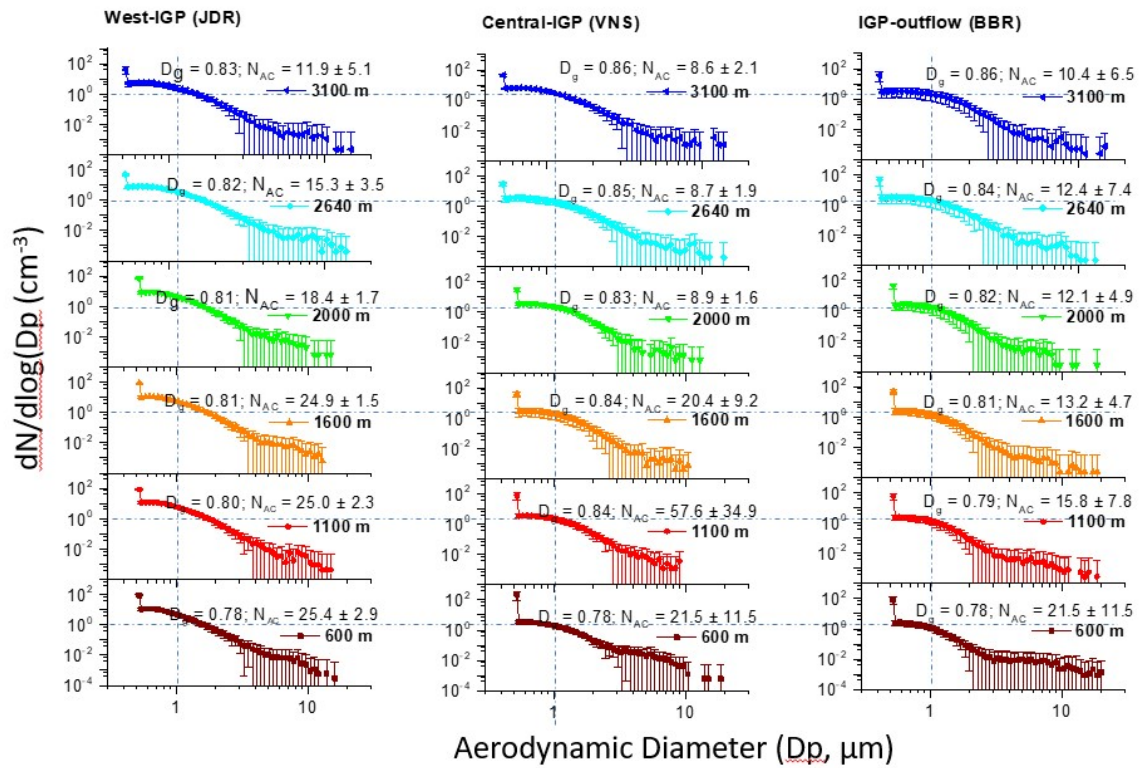

2

3 Figure-S1: Aerosol number size distributions at different heights above the ground level, indicating  
4 the change in the pattern of distribution with altitude and from the western to the eastern part of  
5 India.

6

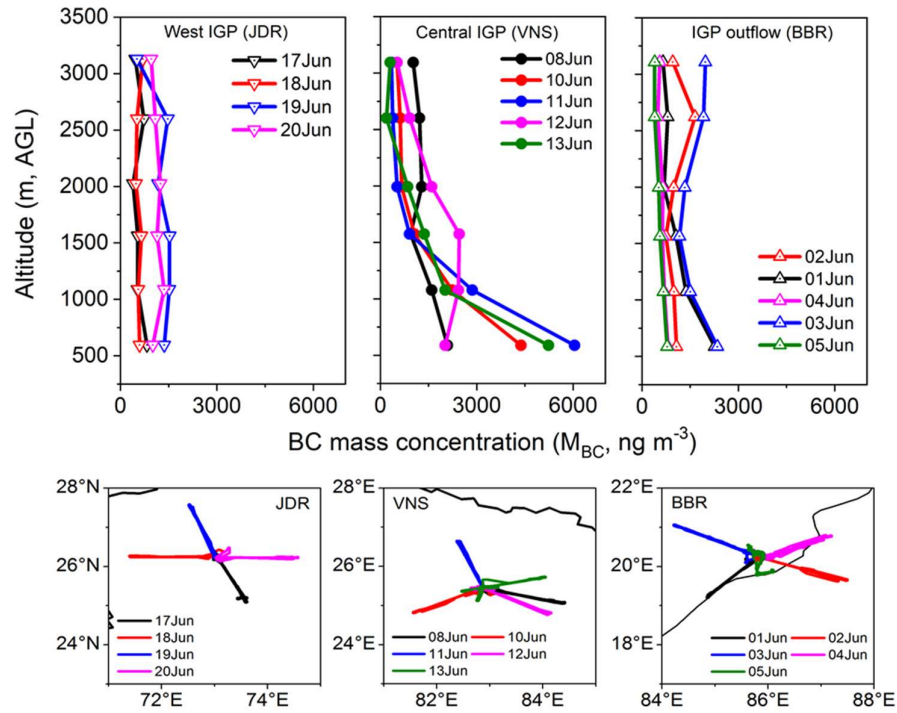

7

8 Figure-S2: Daily profiles of  $M_{BC}$  during each of the flight sorties on different days, along with  
 9 direction of flight sorties (bottom panel) on individual days to delineate local source impacts.
